# Supplementary material
Source: Springer Nature journal article supplement (https://www.springermedizin.de/resource/supplementary/13002_2013_341_MOESM6_ESM.pdf/9627660)

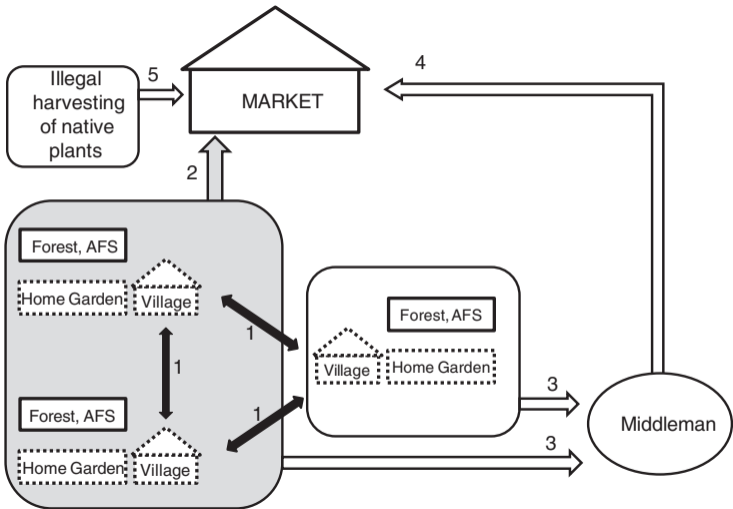

Supplement: MOESM6 [file 9627660]
